# Supplementary material for: Cofilin-1 is a Redox-Sensitive Guard of the NLRP3 Inflammasome
Source: Research Square preprint supplement (doi:10.21203/rs.3.rs-6648864/v1), 2025-05-23
Supplement: Supplementary file 1 [file 0f009464ab68a4703200977e.xlsx]

## Sheet: Table 2
Extended Data Table 2: In silico structural impact predictions for interactions of cofilin-1 and NLRP3 with CAPS-associated mutations
Gene	Amino acid change	Stability (Gibbs free energy) (FL)								Molecule flexibility (Vibrational entropy energy) (FL)	Stability (Gibbs free energy) (FL-CFL1_FL-NLRP3 complex)								Molecule flexibility (Vibrational entropy energy) (FL-CFL1_FL-NLRP3 complex)	Binding affinity (FL-CFL1_FL-NLRP3 complex)			N Atomic Interactions (<5 Angstrom) (FL-CFL1_FL-NLRP3 complex, wt = 46)
		ΔΔG Dynamut (kcal/mol)	ΔΔG Dynamut2 (kcal/mol)	ΔΔG mCSM (kcal/mol)	ΔΔG DDMut (kcal/mol)	ΔΔG ENCoM (kcal/mol)	ΔΔG SDM (kcal/mol)	ΔΔG DUET (kcal/mol)	Average	ΔΔSVib ENCoM (kcal.mol-1.K-1)	ΔΔG Dynamut (kcal/mol)	ΔΔG Dynamut2 (kcal/mol)	ΔΔG mCSM (kcal/mol)	ΔΔG DDMut (kcal/mol)	ΔΔG ENCoM (kcal/mol)	ΔΔG SDM (kcal/mol)	ΔΔG DUET (kcal/mol)	Average	ΔΔSVib ENCoM (kcal.mol-1.K-1)	ΔΔGBinding DDMut-PPI (kcal/mol)	ΔΔGAffinity mCSM PPI2 (kcal/mol)	Average
NLRP3	R260W	-0.374	0.28	-0.013	0.02	-0.072	0.06	-0.191	-0.0414286	0.09	0.192	0.21	-0.119	-0.51	0.183	0.62	-0.107	0.067	-0.229	-1.17	0.008	-0.581	51
NLRP3	D303G	-0.47	-0.28	-0.763	-0.55	-0.65	-2.05	-1.036	-0.828429	0.813	-0.859	-1.08	-1.065	-0.42	-0.552	-0.07	-0.852	-0.699714	0.69	-1	-0.034	-0.517	24
NLRP3	E311K	0.299	0.72	0.397	0.07	0.125	-0.25	0.696	0.293857	-0.156	0.198	-0.03	-0.305	-0.63	0.258	-1.15	-0.214	-0.345167	-0.322	-0.19	-0.352	-0.271	51
NLRP3	A352T	-0.35	-1.77	-1.586	-0.79	0.358	-1.94	-1.749	-1.11814	-0.447	-0.37	-1.51	-1.469	-1.04	0.308	-1.88	-1.613	-1.082	-0.385	-0.46	0.332	-0.064	62
NLRP3	F523L	-0.133	0.18	-0.688	0.47	-0.287	-1.53	-0.747	-0.390714	0.359	-0.509	0.29	-0.524	0.69	-0.2	-1.53	-0.576	-0.337	0.25	-0.3	-0.542	-0.421	65
NLRP3	G569R	0.176	-0.8	-0.421	0.05	0.319	0.03	-0.317	-0.137571	-0.398	-0.314	-0.79	-0.929	-0.33	1.142	-2.25	-0.935	-0.629429	-1.428	-1.34	-1.299	-1.3195	65
NLRP3	G755R	-0.003	-0.81	-1.383	-1.56	1.445	-1.89	-1.33	-0.790143	-1.807	0.101	-0.76	-0.994	-1.87	1.167	-1.94	-0.953	-0.749857	-1.459	-0.24	-0.437	-0.3385	53
NLRP3	Y859C	-0.852	0.42	-0.853	-1.3	-0.547	0.06	-0.658	-0.532857	0.684	-1.22	0.33	-1.182	-1.03	-0.548	0.06	-0.996	-0.655143	0.685	-0.3	-0.608	-0.454	30
* FL, full-length; CFL1, cofilin-1
* Mutant structure compared to wild type structure: ΔΔGwt-mt = ΔGwildtype - ΔGmutant
