# Supplementary material for: Cofilin-1 is a Redox-Sensitive Guard of the NLRP3 Inflammasome
Source: Research Square preprint supplement (doi:10.21203/rs.3.rs-6648864/v1), 2025-05-23
Supplement: Supplementary file 1 [file 6b5ca777a46deffcb0f92ba5.pdf]

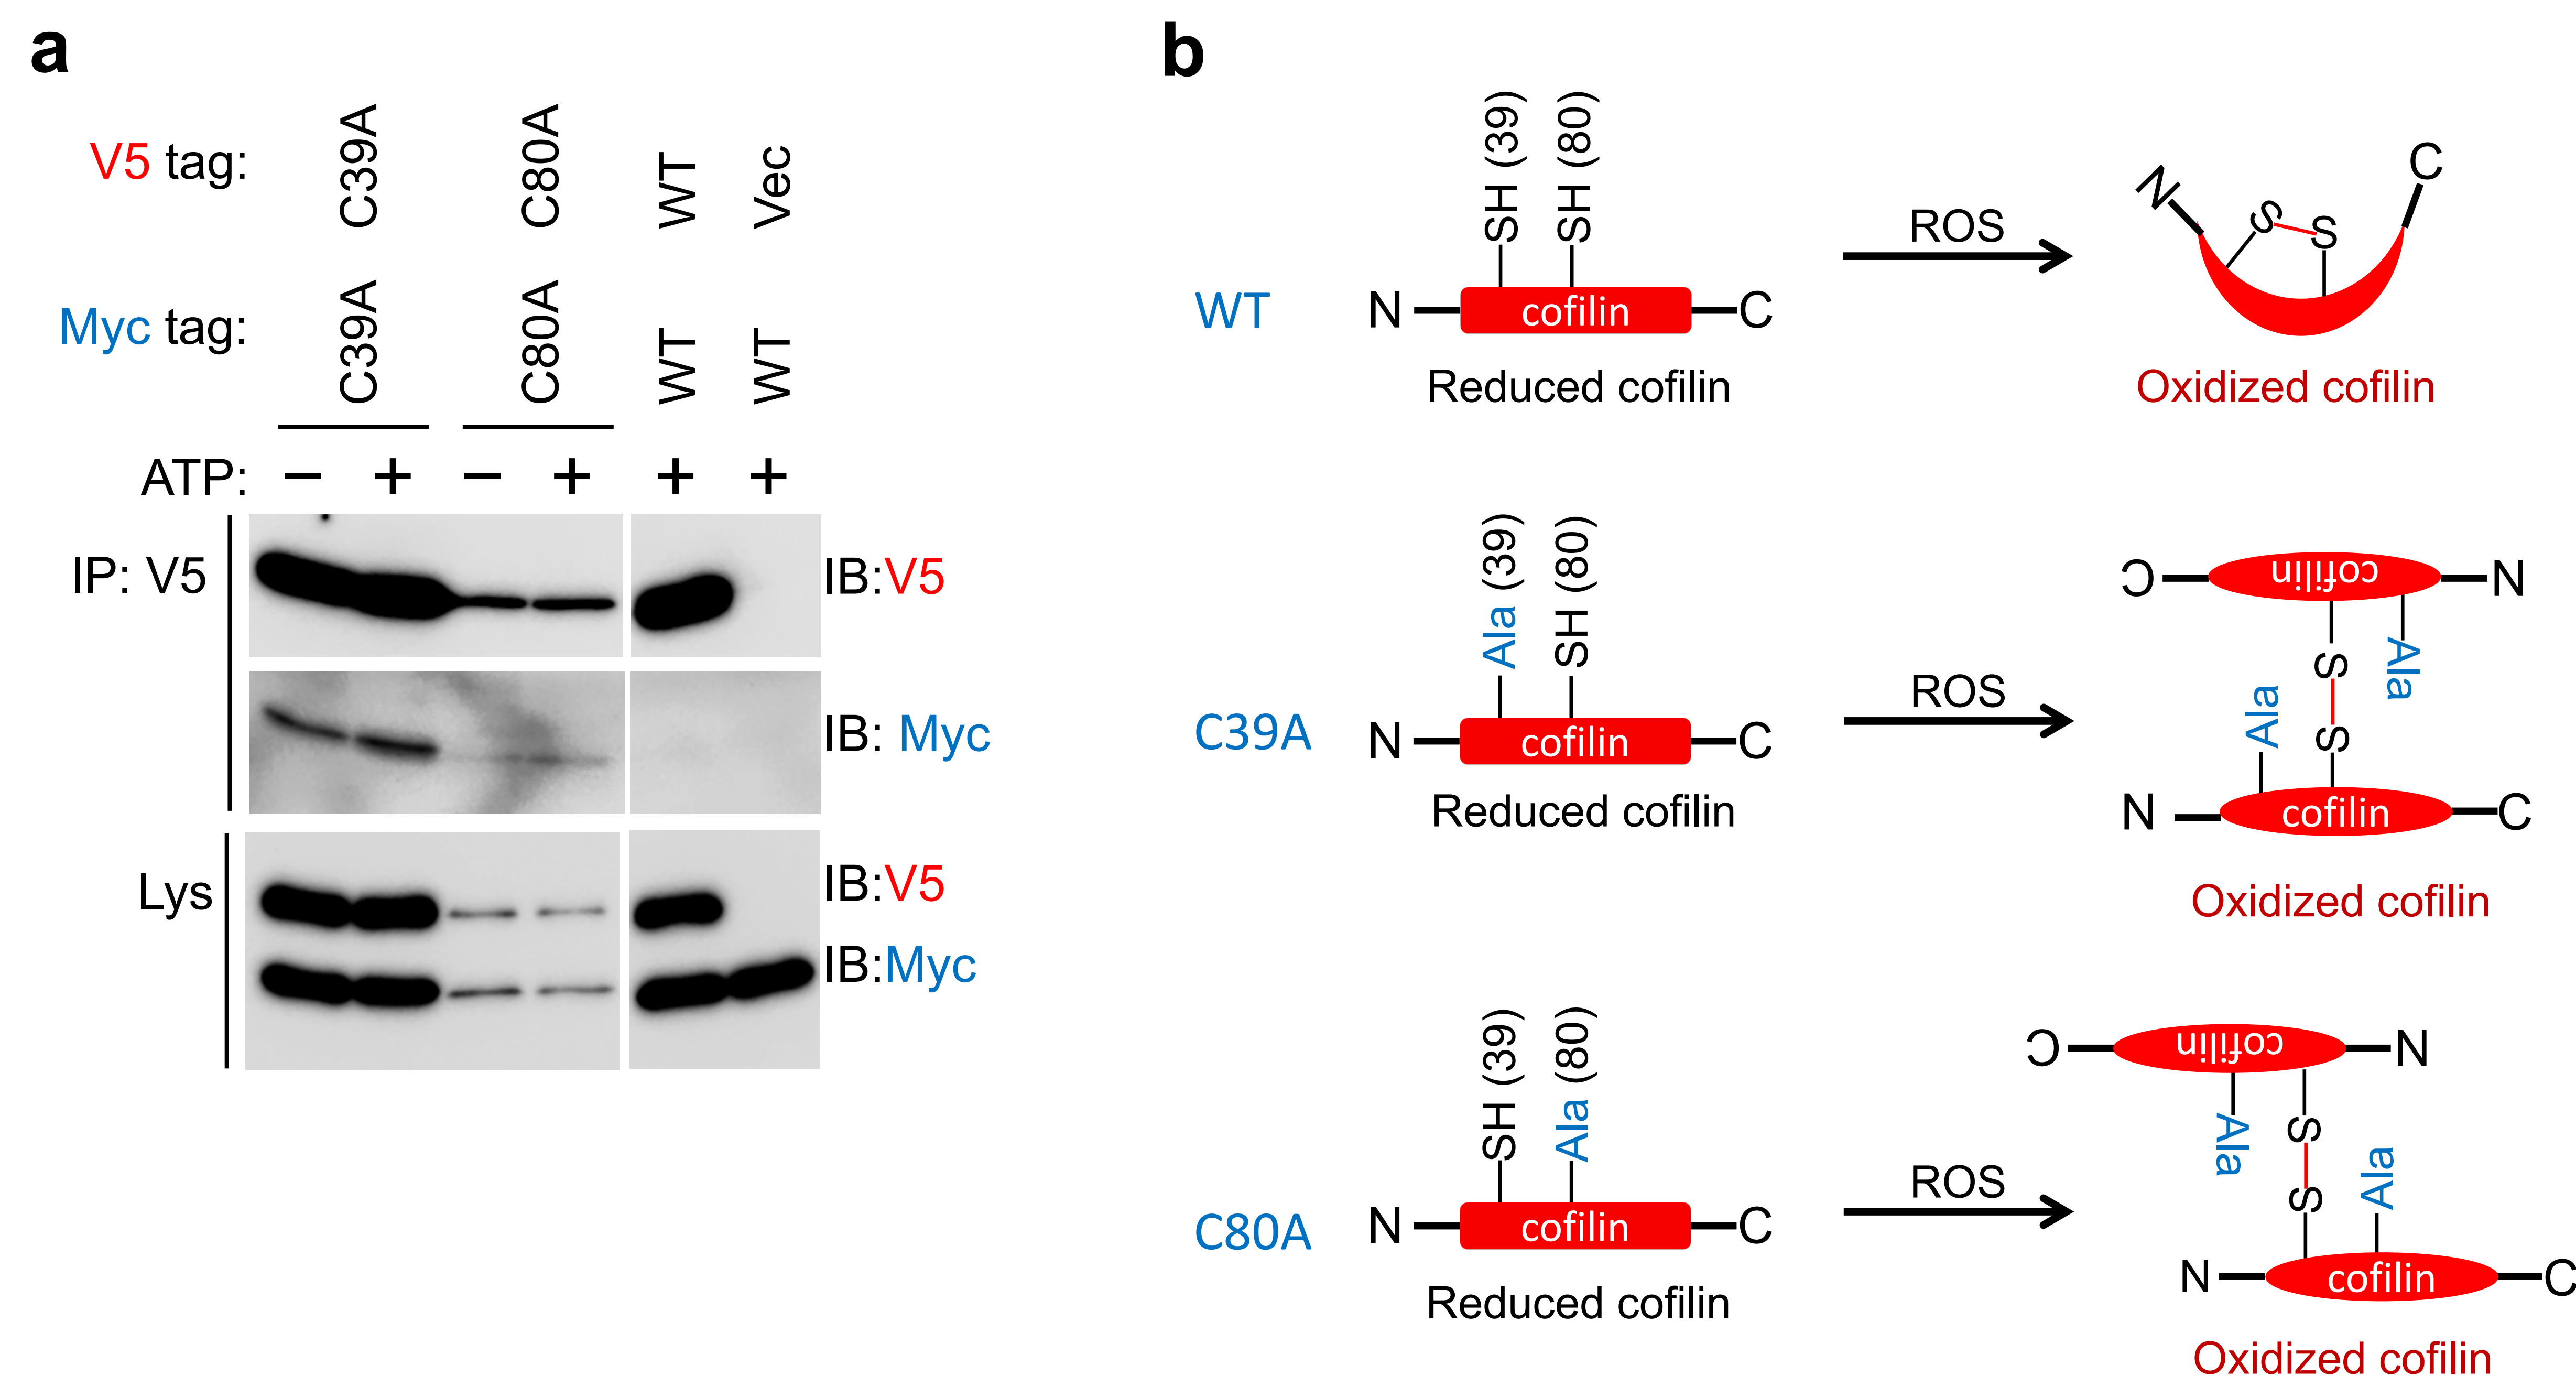

**Extended Data Fig. 4 Cofilin-1 forms intermolecular disulfide bonds.**

**a**, Immunoblot analysis with antibody to V5 or myc for cofilin-1 in proteins IP with anti-V5 antibody from Lys of *Aim2*-deficient BMDMs transiently expressing both V5-tagged and myc-tagged WT cofilin-1 or cofilin-1 with various oxidation resistant cysteine to alanine substitutions (above lanes) and treated with or without ATP. **b**, Proposed model for formation of intramolecular disulfide bond in WT cofilin-1 and intermolecular disulfide bond between two C39A or C80A mutant cofilin-1 molecules when oxidized by ROS.
