# Supplementary material for: Cofilin-1 is a Redox-Sensitive Guard of the NLRP3 Inflammasome
Source: Research Square preprint supplement (doi:10.21203/rs.3.rs-6648864/v1), 2025-05-23
Supplement: Supplementary file 2 [file 13ec06d30f1154ce079a69e0.xlsx]

## Sheet: Table 1
Extended Data Table 1: PRODIGY assessment of binding affinity (ΔG), dissociation constant (Kd), and type of interactions for protein-protein complexes between full-length cofilin and full-length NLRP3 or its various deletion mutants
Protein-protein complex	ΔG (kcal/mol)a	Dissociation constant (Kd) (M)a	Number of interfacial contacts (Ics) per property						Non interacting surface (NIS) per property
			ICs charged-charged	ICs charged-polar	ICs charged-apolar	ICs polar-polar	ICs polar-apolar	ICs apolar-apolar	NIS charged (%)	NIS apolar (%)
Full-length NLRP3 + Full-length cofilin	-8.8	6.3x10-7	12	13	12	3	10	5	32.94	35.41
PYD domain of NLRP3 + Full-length cofilin	-7.9	2.7x10-6	4	3	10	0	13	9	44.72	33.17
PYD + NBD domains of NLRP3 + Full-length cofilin	-8.3	1.3x10-6	12	6	19	1	7	18	40.37	34.63
LRR domain of NLRP3 + Full-length cofilin	-18.9	4.9x10-10	25	32	71	0	16	17	33.41	29.7
NBD domain of NLRP3 + Full-length cofilin	-10	9.0x10-8	10	7	20	1	14	26	39.29	34.52
NBD + LRR domains of NLRP3 + Full-length cofilin	-20.6	3.0x10-15	21	25	65	3	32	33	32.44	32.29
* Smaller ΔG and Kd values show higher predicted binding affinity and stability, respectively.
