# Supplementary material for: Cofilin-1 is a Redox-Sensitive Guard of the NLRP3 Inflammasome
Source: Research Square preprint supplement (doi:10.21203/rs.3.rs-6648864/v1), 2025-05-23
Supplement: Supplementary file 3 [file 147e5a171445c78285cca004.xlsx]

## Sheet: Table 7
Extended Data Table 7: Variant annotation and pathogenicity scores (VEP, AlphaMissense, CADD, REVEL)
Gene	Amino acid change	Variant impact prediction			Allele Frequency (AF)
		AlphaMissense (>0.564)	CADD (>20)	REVEL (>0.65)	GnomAD (AF)
CFL1	F101A	0.998	28	0.909	0
CFL1	I102A	0.983	27.5	0.867	0
CFL1	F103A	0.973	24.7	0.735	0
CFL1	F103Y	0.702	19.29	0.504	0
CFL1	W104A	0.998	33	0.644	0
