# Supplementary material for: Cofilin-1 is a Redox-Sensitive Guard of the NLRP3 Inflammasome
Source: Research Square preprint supplement (doi:10.21203/rs.3.rs-6648864/v1), 2025-05-23
Supplement: Supplementary file 4 [file 426f95872dc3b5f11e4db1c3.xlsx]

## Sheet: Table 6
Extended Data Table 6: In silico structural impact predictions for interactions of NLRP3 and cofilin-1 variants with single-residue substitutions at each position of the binding motif
Gene	Amino acid change	Stability (Gibbs free energy) (FL)								Molecule flexibility (Vibrational entropy energy) (FL)	Stability (Gibbs free energy) (FL-CFL1_FL-NLRP3 complex)								Molecule flexibility (Vibrational entropy energy) (FL-CFL1_FL-NLRP3 complex)	Binding affinity (FL-CFL1_FL-NLRP3 complex)			N Atomic Interactions (<5 Angstrom) (FL-CFL1_FL-NLRP3 complex, wt = 46)
		ΔΔG Dynamut (kcal/mol)	ΔΔG Dynamut2 (kcal/mol)	ΔΔG mCSM (kcal/mol)	ΔΔG DDMut (kcal/mol)	ΔΔG ENCoM (kcal/mol)	ΔΔG SDM (kcal/mol)	ΔΔG DUET (kcal/mol)	Average	ΔΔSVib ENCoM (kcal.mol-1.K-1)	ΔΔG Dynamut (kcal/mol)	ΔΔG Dynamut2 (kcal/mol)	ΔΔG mCSM (kcal/mol)	ΔΔG DDMut (kcal/mol)	ΔΔG ENCoM (kcal/mol)	ΔΔG SDM (kcal/mol)	ΔΔG DUET (kcal/mol)	Average	ΔΔSVib ENCoM (kcal.mol-1.K-1)	ΔΔGBinding DDMut-PPI (kcal/mol)	ΔΔGAffinity mCSM PPI2 (kcal/mol)	Average
CFL1	F101A	-3.156	-3.06	-2.814	-2.51	-0.923	-3.73	-3.335	-2.78971	1.154	-2.85	-3.19	-2.99	-2.43	-0.873	-3.73	-3.501	-2.79486	1.091	-0.15	-0.591	-0.3705	65
CFL1	I102A	-2.269	-2.46	-2.539	-2.13	-0.33	-4.71	-3.274	-2.53029	0.413	-2.445	-3.23	-2.785	-3.23	-0.375	-4.71	-3.509	-2.89771	0.469	-0.32	-0.597	-0.4585	61
CFL1	F103A	-2.635	-2.76	-2.664	-1.53	-0.905	-3.73	-3.191	-2.48786	1.131	-3.018	-3.01	-2.819	-2.45	-0.966	-3.73	-3.339	-2.76171	1.208	-0.49	-0.974	-0.732	165
CFL1	F103Y	-0.094	-0.42	-0.787	0.33	-0.05	-0.78	-0.593	-0.342	0.063	-0.296	-0.05	-0.929	-0.63	0.484	-0.83	-0.76	-0.430143	-0.605	-0.21	0.028	-0.091	76
CFL1	W104A	-3.524	-3.56	-3.463	-1.89	-1.085	-4.14	-3.446	-3.01543	1.356	-3.534	-3.71	-3.537	-2.43	-1.111	-4.14	-3.501	-3.13757	1.388	-1.15	-0.726	-0.938	24
* FL, full-length; CFL1, cofilin-1
* Mutant structure compared to wild type structure: ΔΔGwt-mt = ΔGwildtype - ΔGmutant
