# Supplementary material for: Cofilin-1 is a Redox-Sensitive Guard of the NLRP3 Inflammasome
Source: Research Square preprint supplement (doi:10.21203/rs.3.rs-6648864/v1), 2025-05-23
Supplement: Supplementary file 5 [file 75b8682271295af6b9848f52.xlsx]

## Sheet: Table 5
Extended Data Table 5: HADDOCK-calculated docking statistics for AlphaFold3-predicted reduced cofilin-1–NLRP3 and HADDOCK-generated oxidized cofilin-1–NLRP3 complexes
Parameter (mean ± SD)	Reduced Cofilin-1–NLRP3 complex	Oxidized Cofilin-1–NLRP3 complex
HADDOCK score	-89.3 ± 1.9	-52.5 ± 2.5
Cluster size, n	37	49
RMSD from lowest-energy model, Å	1.1 ± 0.2	8.1 ± 0.4
Van der Waals energy, kcal/mol	-29.6 ± 2.9	-17.6 ± 1.5
Electrostatic energy, kcal/mol	-366.8 ± 18.2	-388.5 ± 50.5
Desolvation energy, kcal/mol	13.7 ± 2.3	2.8 ± 4.5
Buried Surface Area, Å²	1681.2 ± 44.1	1406.6 ± 150.2
*RMSD, Root-Mean-Square Deviation
