# Supplementary material for: Cofilin-1 is a Redox-Sensitive Guard of the NLRP3 Inflammasome
Source: Research Square preprint supplement (doi:10.21203/rs.3.rs-6648864/v1), 2025-05-23
Supplement: Supplementary file 6 [file b879d1e10c78ef25f20b1326.xlsx]

## Sheet: Table 3
Extended Data Table 3: Comparison of solvent-accessible surface area (SASA) between reduced and oxidized cofilin-1 models
	Reduced Cofilin-1	Oxidized Cofilin-1
Number of Atoms	1296	1296
Total SASA (Å²)	9320.1	8762.1
* The reduced form corresponds to the AlphaFold model (AF-P23528-F1) with a Cys39–Cys80 distance of 11.625 Å.
* The oxidized form was generated using Rosetta and ChimeraX and includes a disulfide bond between Cys39 and Cys80.
