# Supplementary material for: Cofilin-1 is a Redox-Sensitive Guard of the NLRP3 Inflammasome
Source: Research Square preprint supplement (doi:10.21203/rs.3.rs-6648864/v1), 2025-05-23
Supplement: Supplementary file 7 [file ec9e77bc4ff7e418a1ed6696.xlsx]

## Sheet: Table 4
Extended Data Table 4: Output data from the HADDOCK run for oxidized cofilin-1–NLRP3 complex with docking statistics for the top two clusters of docking solutions
Parameter (mean ± SD)	Cluster 1	Cluster 3
HADDOCK score	-52.5 ± 2.5	-53.7 ± 11.2
Cluster size, n	49	14
RMSD from lowest-energy model, Å	8.1 ± 0.4	0.9 ± 0.9
Van der Waals energy, kcal/mol	-17.6 ± 1.5	-34.2 ± 4.7
Electrostatic energy, kcal/mol	-388.5 ± 50.5	-254.5 ± 25.2
Desolvation energy, kcal/mol	2.8 ± 4.5	-10.9 ± 4.3
Restraints violation energy, kcal/mol	398.9 ± 64.3	421.8 ± 67.1
Buried Surface Area, Å²	1406.6 ± 150.2	1269.5 ± 47.6
Z-Score	-1.3	-1.3
*RMSD, Root-Mean-Square Deviation
